# Supplementary material
Source: PubMed Central journal article supplement (PMC3021627)
Supplement: NIHMS230650-supplement-2_si_002.pdf [file NIHMS230650-supplement-2_si_002.pdf]

Movie Legends:

**Video 1** Live SKBR-3 cells recorded using digital video microscopy in the presence of selected SKBR-3 cell internalizing phage (L1).

**Video 2** Live SKBR-3 cells recorded using digital video microscopy in the presence of wild type phage.
